# Supplementary material for: Skillfully deflecting the question: a small amount of piperazine-1,4-diium iodide radically enhances the thermal stability of CsPbI3 perovskite
Source: Royal Society of Chemistry journal article supplement (doi:10.1039/c9tc03576a), 2019-01-01
Supplement: c9tc03576a1.pdf [file c9tc03576a1.pdf]

*Skillfully Deflected the Question: A Small Amount of Piperazine-1,4-dium Iodide*

Radically Enhances the Thermal Stability of CsPbI<sub>3</sub> Perovskite

Hailiang Wang<sup>a</sup>, Sisi Xiang<sup>a</sup>, Weiping Li<sup>a</sup>, Huicong Liu<sup>a</sup>, Liquan Zhu<sup>a</sup>, Shuang Xiao<sup>b</sup>, Shihe Yang<sup>b,c\*</sup>, Haining Chen<sup>a\*</sup>

a. School of Materials Science and Engineering, Beihang University, No. 37 Xueyuan Road, Haidian District, Beijing 100191, People's Republic of China.

b. Guangdong Key Lab of Nano-Micro Material Research, School of Chemical Biology and Biotechnology, Shenzhen Graduate School, Peking University, Shenzhen 518055, China.

c. Department of Chemistry, The Hong Kong University of Science and Technology, Clear Water Bay, Kowloon, Hong Kong, China.

\*Corresponding email: chsyang@ust.hk; [chenhaining@buaa.edu.cn](mailto:chenhaining@buaa.edu.cn)

## Supporting information

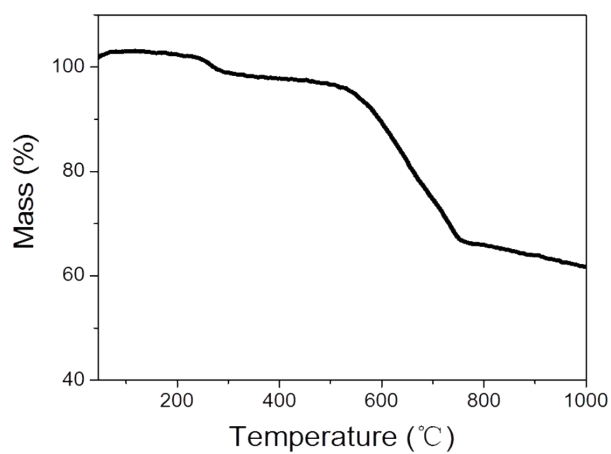

**Figure S1.** TG analysis of the pristine CsPbI<sub>3</sub> film. Three weight loss stages at 250 °C, 540 °C and 770 °C, corresponding to the sublimation of dimethylammonium iodide (DMAI), PbI<sub>2</sub> and CsI, respectively. The ratio of DMAI/CsI is calculated to be about 8.2% in the film.

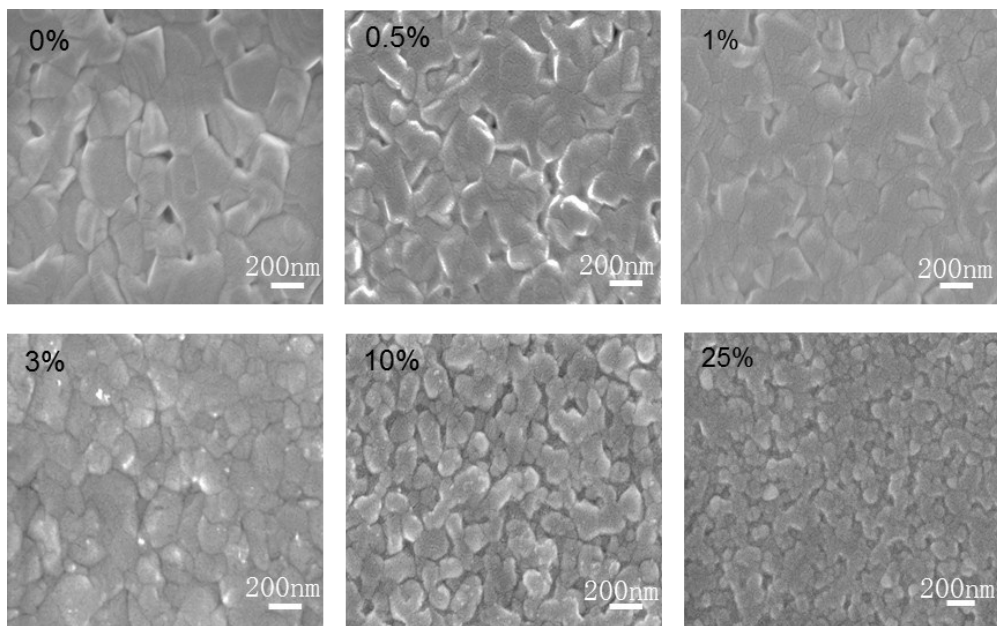

**Figure S2.** Top-view SEM images of the CsPbI<sub>3</sub>·xPZDI<sub>2</sub> films with different x values.

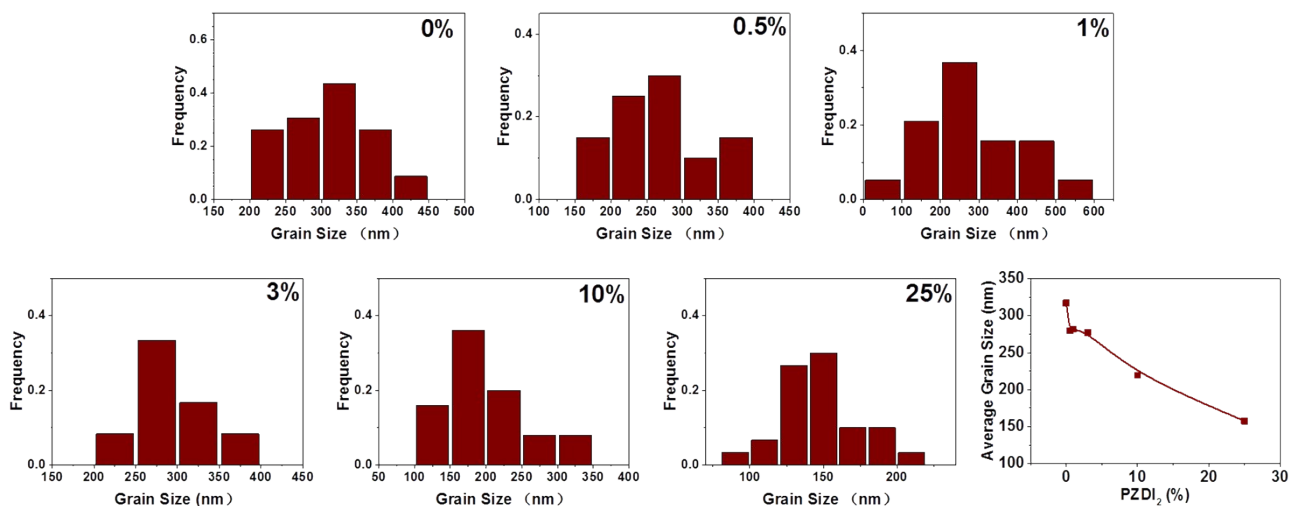

**Figure S3.** Grain-size distributions that are taken from the corresponding SEM images and relationship of the average grain size with PZDI<sub>2</sub> contents ( $x < 25\%$ ).

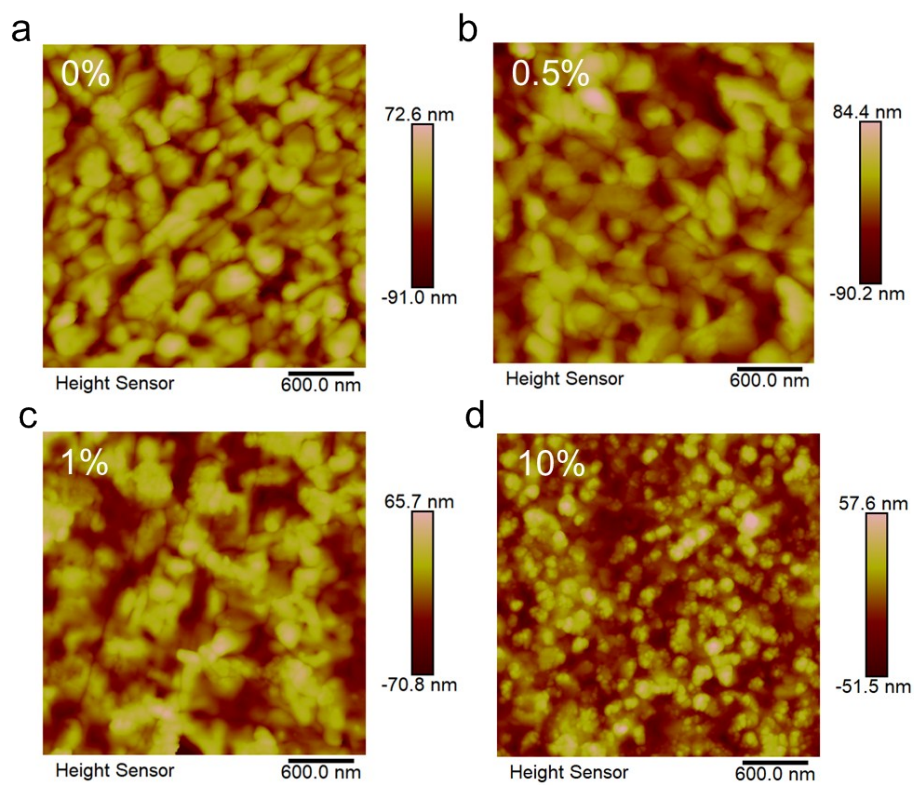

**Figure S4.** AFM images of CsPbI<sub>3</sub>·xPZDI<sub>2</sub> films: (a) x = 0, (b) x = 0.5%, (c) x = 1% and (d) x = 10%.

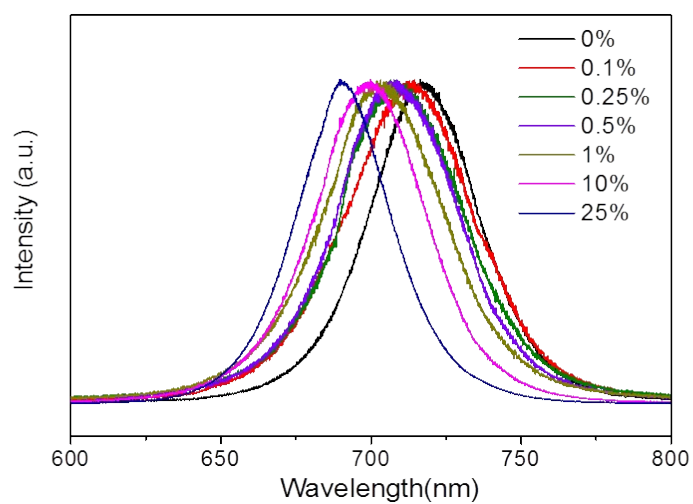

**Figure S5.** Steady-state PL spectra of the CsPbI<sub>3</sub>·xPZDI<sub>2</sub> films deposited on glass side.

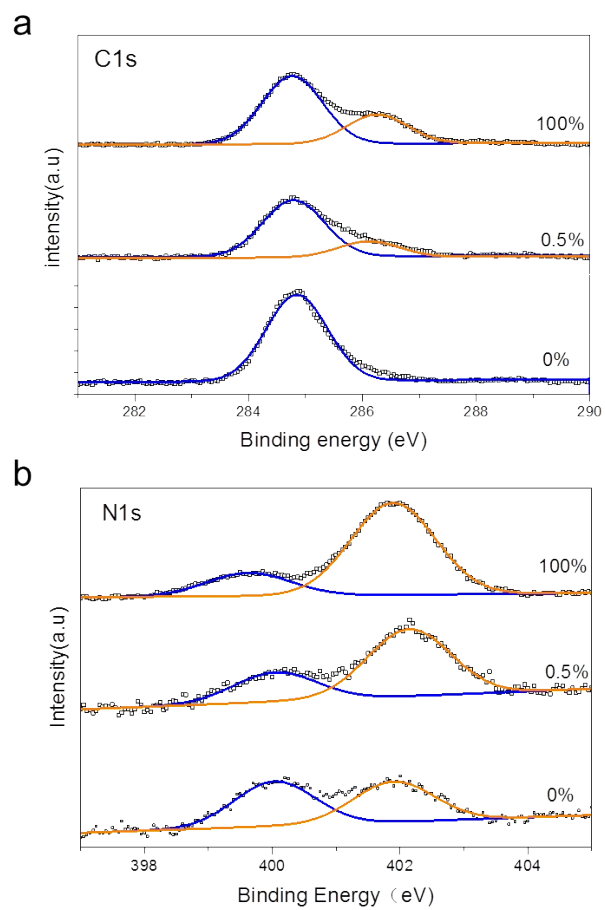

**Figure S6.** XPS spectra of (a) C 1s and (b) N 1s for CsPbI<sub>3</sub>, CsPbI<sub>3</sub>·0.5%PZDI<sub>2</sub> and CsPbI<sub>3</sub>·100%PZDI<sub>2</sub> films.

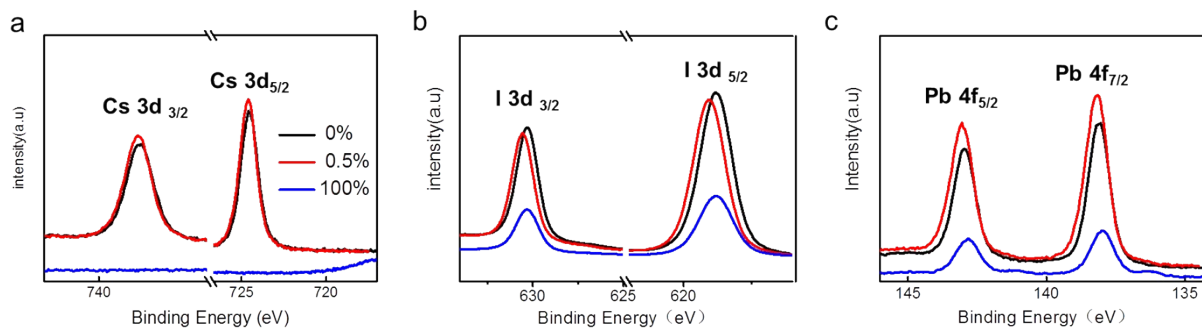

**Figure S7.** Comparison of XPS spectra of the CsPbI<sub>3</sub>, CsPbI<sub>3</sub>·0.5%PZDI<sub>2</sub> and CsPbI<sub>3</sub>·100%PZDI<sub>2</sub> films: (a) Cs 3d, (b) I 3d and (c) Pb 4f.



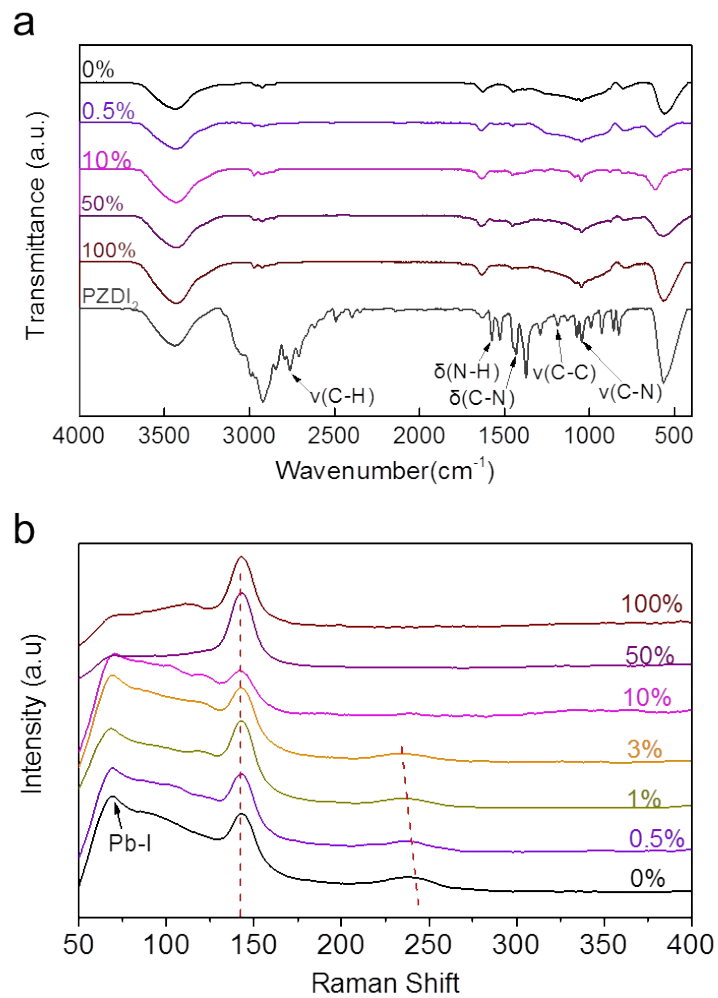

**Figure S8.** FTIR and Raman spectra of the CsPbI<sub>3</sub>·xPZDI<sub>2</sub> samples: (a) FTIR spectra of CsPbI<sub>3</sub>·xPZDI<sub>2</sub> and PZDI<sub>2</sub> powder and (b) Raman spectra of CsPbI<sub>3</sub>·xPZDI<sub>2</sub> film. The traces are shifted vertically for clarity.

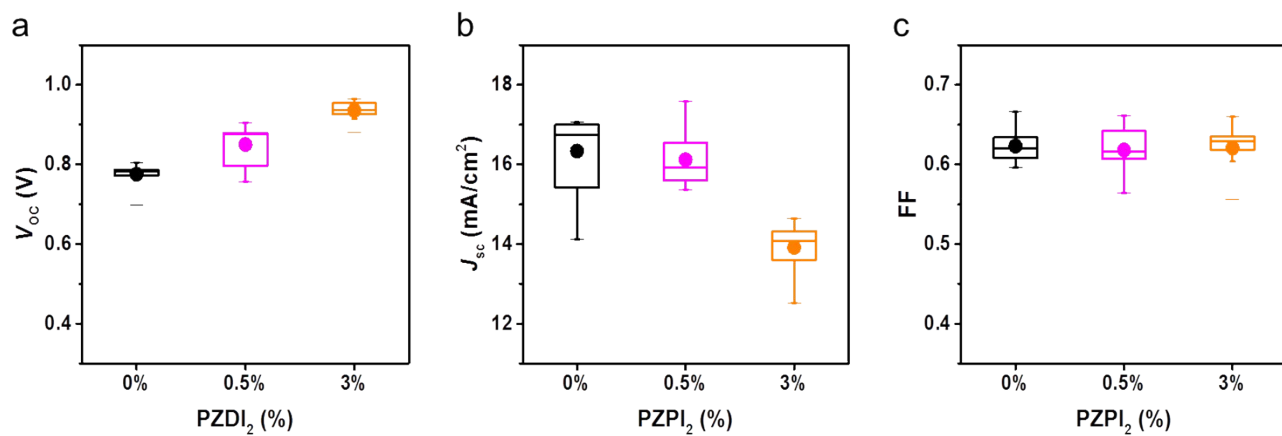

**Figure S9.** Distributions of the (a)  $V_{oc}$ , (b)  $J_{sc}$  and (c) FF obtained from CsPbI<sub>3</sub>, CsPbI<sub>3</sub>·0.5%PZDI<sub>2</sub> and CsPbI<sub>3</sub>·3%PZDI<sub>2</sub> C-PSCs.

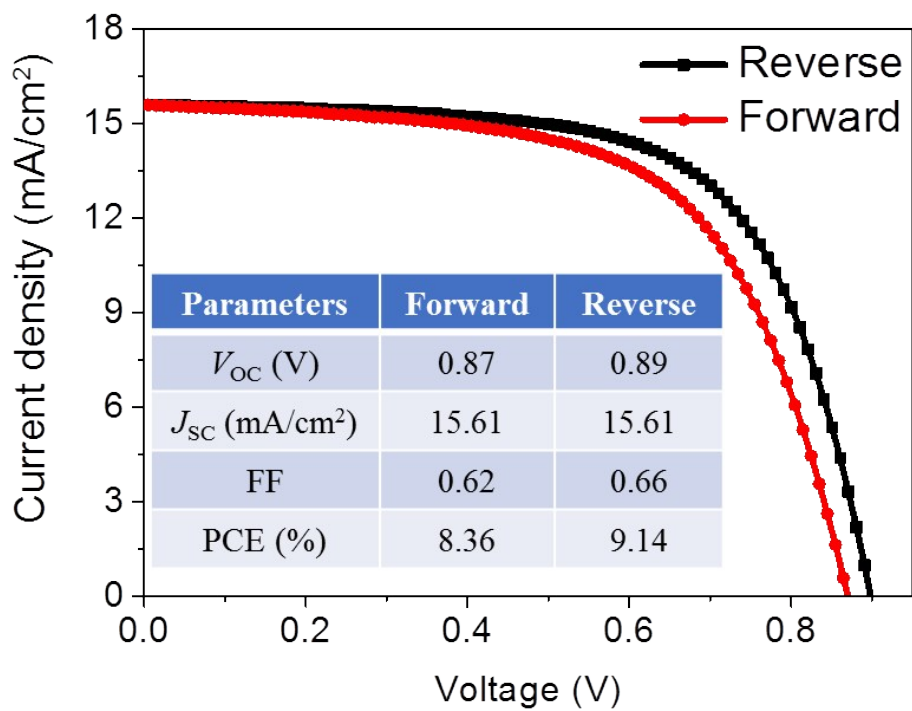

**Figure S10.** *J-V* curves of the CsPbI<sub>3</sub>·0.5%PZDI<sub>2</sub> C-PSCs under forward and reverse scans. The hysteresis index is calculated to be 8.5%.

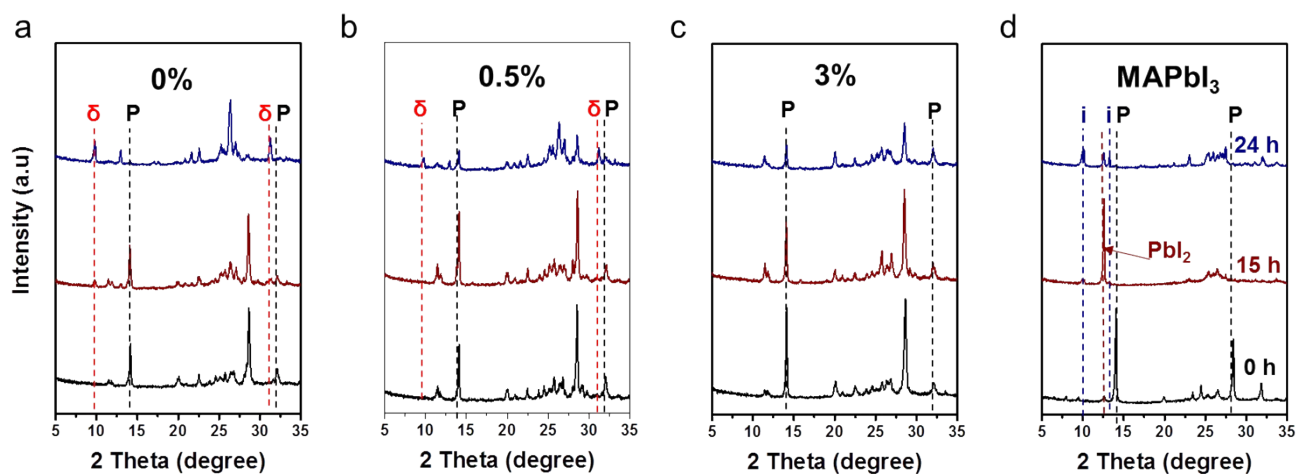

**Figure S11.** XRD patterns of the corresponding perovskite samples after heating at 100 °C for different duration: (a) CsPbI<sub>3</sub>, (b) CsPbI<sub>3</sub>-0.5%PZDI<sub>2</sub>, (c) CsPbI<sub>3</sub>-3%PZDI<sub>2</sub> and (d) MAPbI<sub>3</sub>. The  $\delta$  represents the yellow CsPbI<sub>3</sub> phase, while the P denotes the photoactive CsPbI<sub>3</sub> perovskite phases.

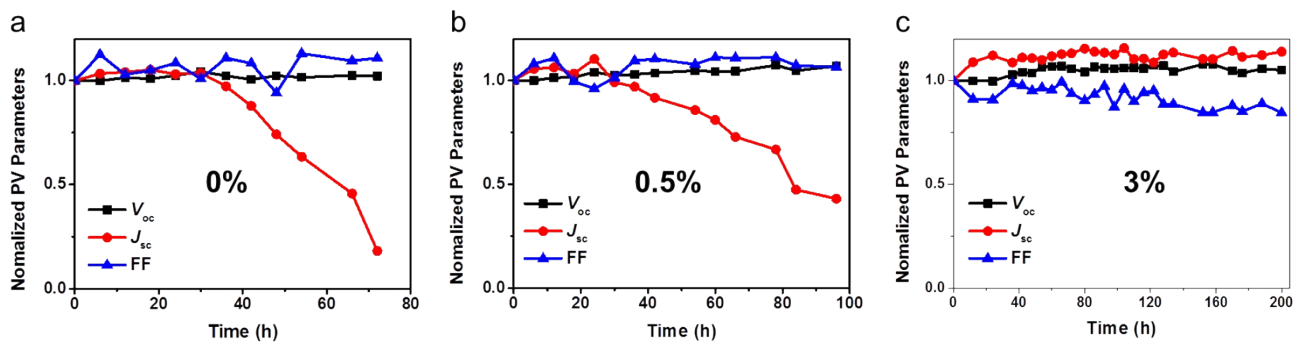

**Figure S12.** Data of the thermal stability tests of CsPbI<sub>3</sub>-xPZDI<sub>2</sub> C-PSCs: Change of PV parameters with storage time at 85 °C in a dry air (RH ~ 10-20%): (a) CsPbI<sub>3</sub>, (b) CsPbI<sub>3</sub>-0.5%PZDI<sub>2</sub> and (c) CsPbI<sub>3</sub>-3%PZDI<sub>2</sub>.
